# Supplementary material
Source: PubMed Central journal article supplement (PMC3217104)
Supplement: NIHMS317204-supplement-supplement_1.pdf [file NIHMS317204-supplement-supplement_1.pdf]

**Supplementary Table.** Adjusted mean (SE) mean arterial pressure (MAP), by trimester and history of migraine, after excluding women with incident gestational hypertension or preeclampsia

| Migraine       | <u>First Trimester</u>   |                   | <u>Second Trimester</u>  |                     | <u>Third Trimester</u>   |                    |
|----------------|--------------------------|-------------------|--------------------------|---------------------|--------------------------|--------------------|
|                | Unadjusted<br>Mean [SE]  | Δ (95% CI)        | Unadjusted<br>Mean [SE]  | Δ (95% CI)          | Unadjusted<br>Mean [SE]  | Δ (95% CI)         |
| NO             | 82.56 [0.13]             |                   | 81.95 [0.11]             |                     | 84.32 [0.13]             |                    |
| YES            | 83.33 [0.33]             | 0.77 (0.1 to 1.4) | 81.88 [0.29]             | -0.07 (-0.6 to 0.5) | 86.78 [0.31]             | 2.26 (1.17 to 2.8) |
| <b>MODEL 1</b> |                          |                   |                          |                     |                          |                    |
| Migraine       | * Adjusted<br>Mean [SE]  | Δ (95% CI)        | * Adjusted<br>Mean [SE]  | Δ (95% CI)          | * Adjusted<br>Mean [SE]  | Δ (95% CI)         |
| NO             | 82.92 [0.16]             |                   | 82.98 [0.10]             |                     | 84.87 [0.13]             |                    |
| YES            | 83.66 [0.33]             | 0.74 (0.4 to 1.4) | 83.36 [0.29]             | -0.11 (-0.7 to 0.4) | 87.10 [0.31]             | 2.23 (1.7 to 2.8)  |
| <b>MODEL 2</b> |                          |                   |                          |                     |                          |                    |
| Migraine       | ** Adjusted<br>Mean [SE] | Δ (95% CI)        | ** Adjusted<br>Mean [SE] | Δ (95% CI)          | ** Adjusted<br>Mean [SE] | Δ (95% CI)         |
| NO             | 82.11 [0.16]             |                   | 81.39 [0.11]             |                     | 84.07 [0.13]             |                    |
| YES            | 82.88 [0.33]             | 0.77 (0.2 to 1.4) | 81.31 [0.27]             | -0.08 (-0.6 to 0.4) | 86.34 [0.28]             | 2.27 (1.7 to 2.8)  |

<sup>1</sup>Adjusted for age, race/ethnicity, parity, smoking and prenatal vitamin use. Adjusted mean values reported for MODEL 1 are from a regression model based on the entire study cohort (N = 3,373) with indicators variables specified to represent Non-Hispanic white, nulliparous, non-smoking women from 25-34 years of age.

<sup>2</sup>Adjusted for age, race/ethnicity, parity, smoking, prenatal vitamin use, and pre-pregnancy body mass index. Adjusted mean values reported for MODEL 2 are from a regression model based on the entire cohort (N = 3,373) with indicators variables specified to represent Non-Hispanic white, nulliparous, non-smoking women from 25-34 years of age, with a pre-pregnancy BMI < 25 kg/m<sup>2</sup>.
